# Supplementary material for: Analysis of bacterial plasmid DNA by solid-phase microextraction
Source: Royal Society of Chemistry journal article supplement (doi:10.1039/c5ay00532a), 2015-01-01
Supplement: c5ay00532a1.pdf [file c5ay00532a1.pdf]

## ***Supporting Information***

### **Analysis of Bacterial Plasmid DNA by Solid-Phase Microextraction**

**Omprakash Nacham, Kevin D. Clark, and Jared L. Anderson\***

*Department of Chemistry and Biochemistry, The University of Toledo, Toledo, OH 43606 USA*

| <b>Table of contents:</b> | <b>Page No.</b> |
|---------------------------|-----------------|
| 1. Figure S1              | S2              |
| 2. Figure S2              | S3              |
| 3. Figure S3              | S4              |
| 4. Figure S4              | S5              |

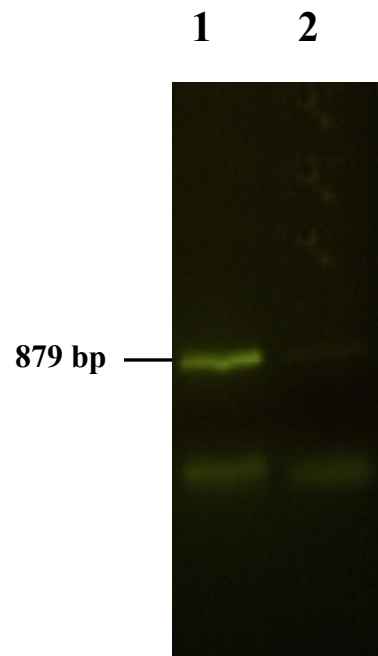

**Figure S1.** Effect of NaCl on desorption of 6.7 kbp pDNA containing the MTAP gene (879 bp) from PIL fiber. Extraction conditions: pDNA concentration: 20 ng/mL; total solution volume: 10 mL; pH 4.0; extraction time: 20 min; desorption time: 15 min. desorption solution volume: 50  $\mu$ L. Lane (1): PCR products obtained following extraction and desorption of PIL fiber in aqueous solution containing 1 M NaCl and 20 mM Tris HCl; Lane (2): PCR products obtained following extraction and desorption of PIL fiber in 20 mM Tris HCl solution.

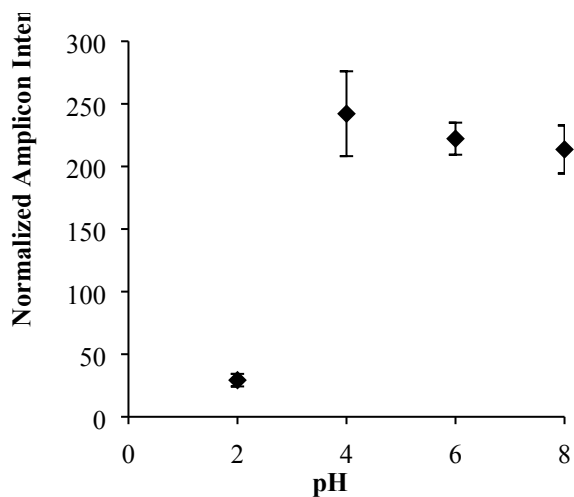

**Figure S2.** Effect of aqueous solution pH on the intensity of the PCR product obtained following PIL-based SPME of 6.7 kbp pDNA and PCR amplification of an 879 bp gene. The extractions were performed in triplicate. Conditions: pDNA concentration: 20 ng/mL; total solution volume: 10 mL; desorption solution: 1 M NaCl in 20 mM Tris HCl; desorption solution volume: 50  $\mu$ L; pH 4.0; extraction time: 20 min; desorption time: 15 min.

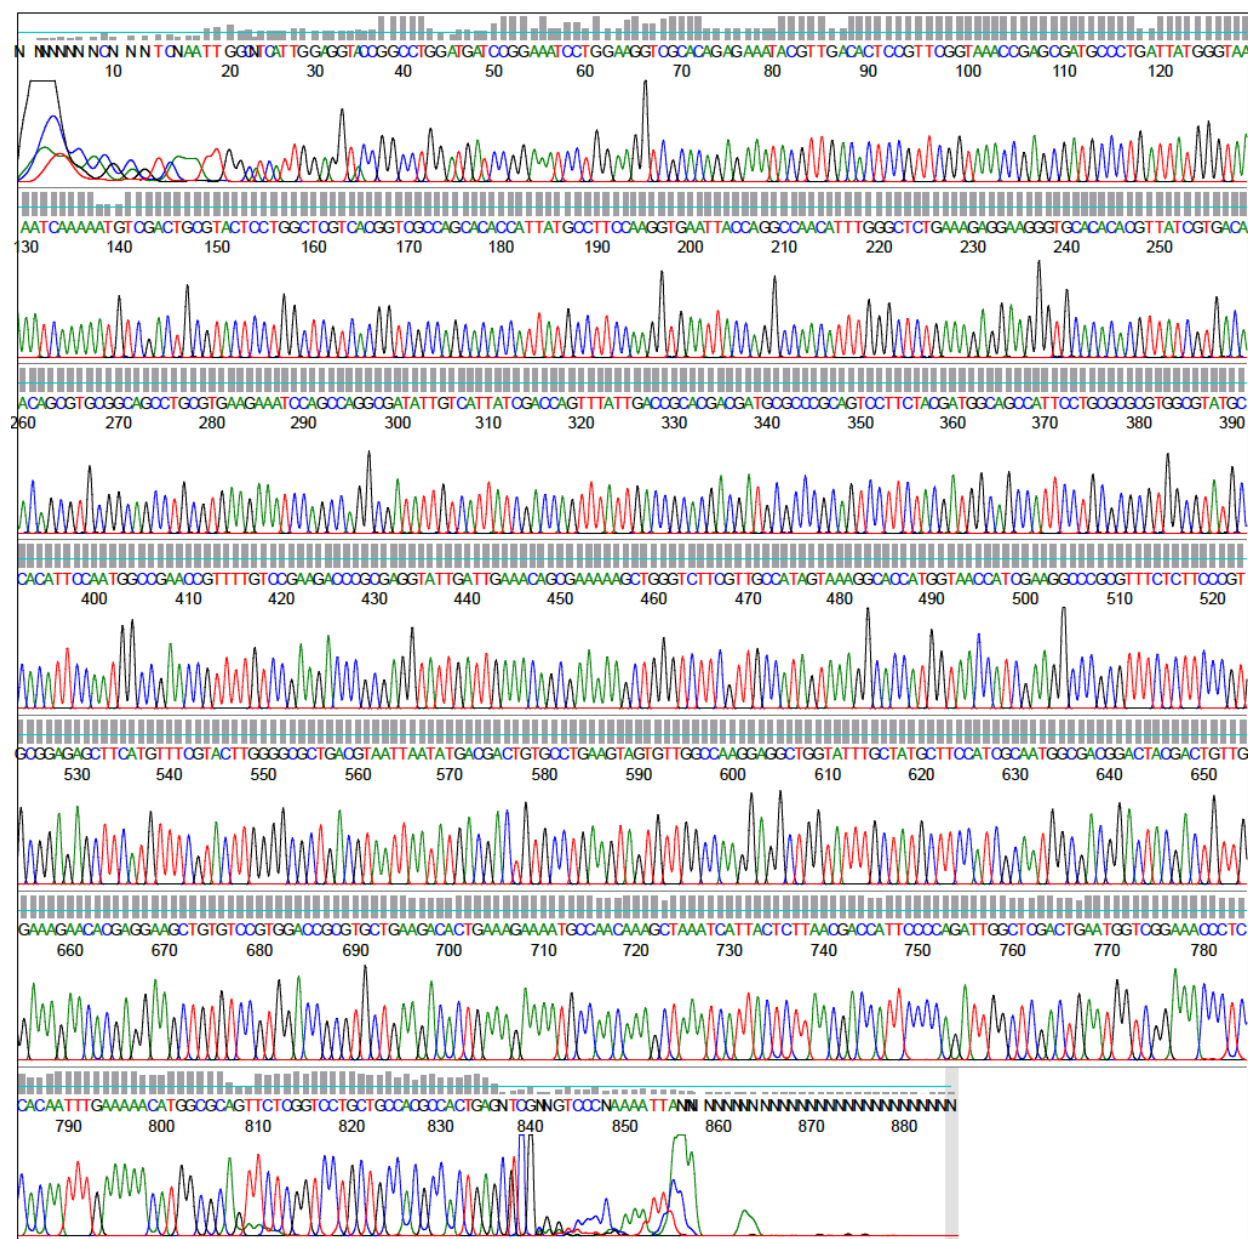

**Figure S3.** Electropherogram from the sequencing of the MTAP gene amplified from pDNA extracted by the PIL sorbent coating.

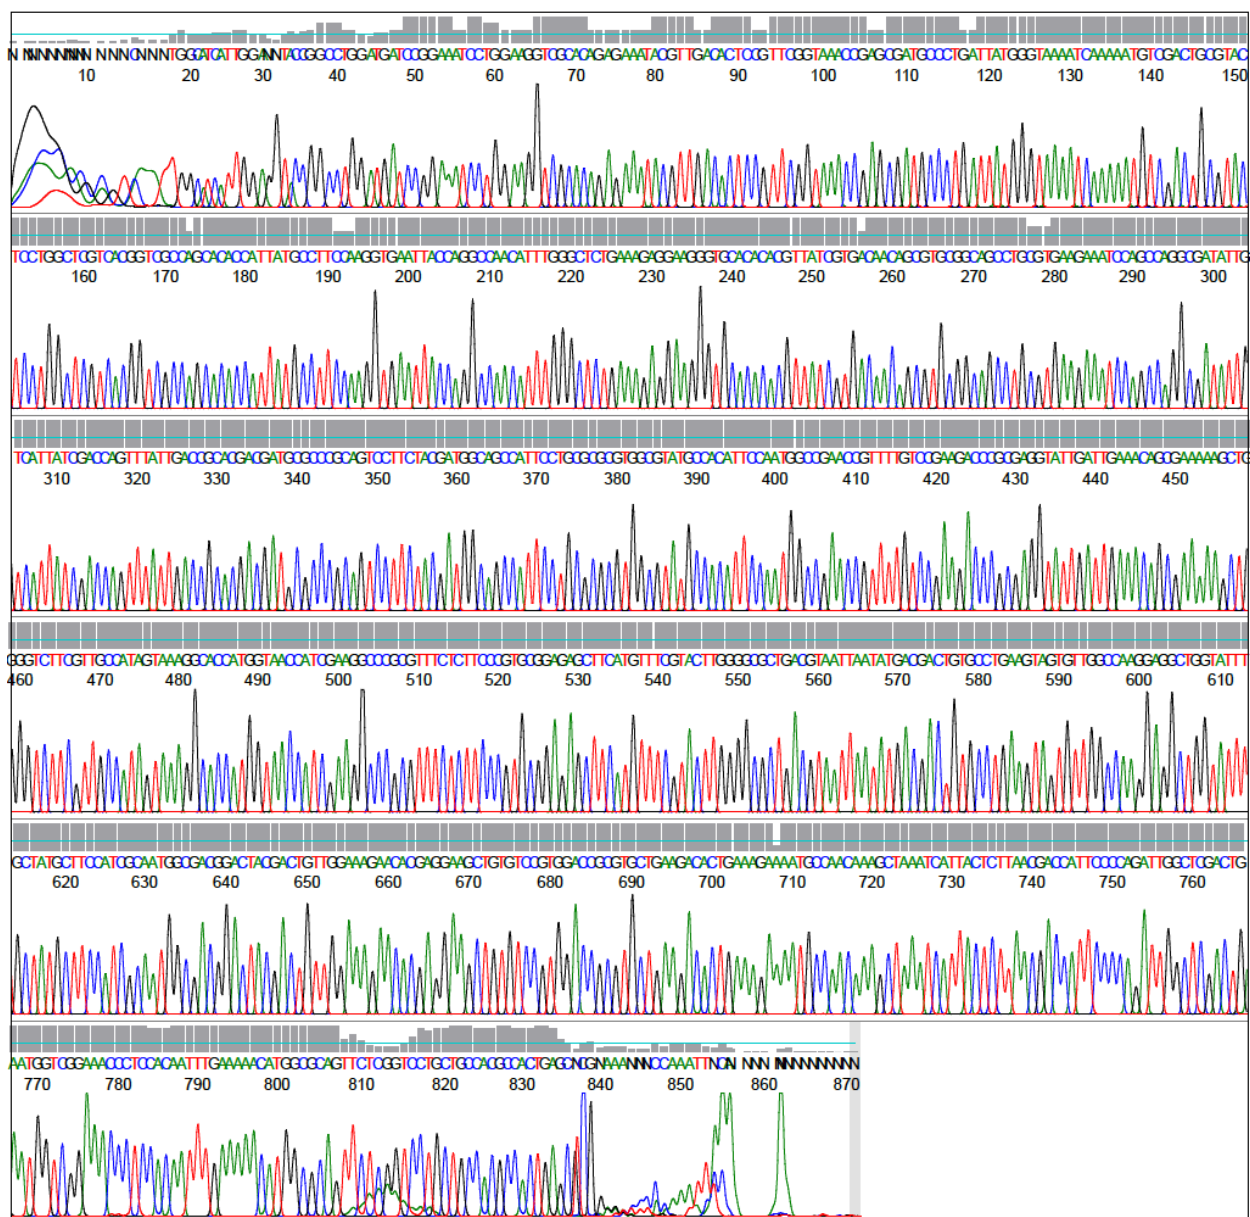

**Figure S4.** Electropherogram from the sequencing of the MTAP gene amplified from standard pDNA.
